# Supplementary material for: Endogenous Abscisic Acid Promotes Hypocotyl Growth and Affects Endoreduplication during Dark-Induced Growth in Tomato (Solanum lycopersicum L.)
Source: PubMed Central journal article supplement (PMC4334974; doi:10.1371/journal.pone.0117793), 2015-02-19
Supplement: pone.0117793.s001.pdf [file pone.0117793.s001.pdf]

**Supporting table S1** The values of hypocotyl length used for data normalization. Medians, first and third quartiles are given. The control sample used for data normalization is marked as “norm.”

| <b>Figure</b> | <b>Genotype and/or treatment</b> | <b>Median hypocotyl length [mm]</b> | <b>1st quartile [mm]</b> | <b>3rd quartile [mm]</b> |       |
|---------------|----------------------------------|-------------------------------------|--------------------------|--------------------------|-------|
| <b>2A</b>     | WT control                       | 98                                  | 91                       | 104                      | norm. |
|               | WT 100 nM ABA                    | 101                                 | 98                       | 103                      |       |
|               | sit control                      | 80                                  | 72                       | 84                       |       |
|               | sit 100 nM ABA                   | 99                                  | 94                       | 106                      |       |
| <b>2B</b>     | control                          | 53                                  | 46                       | 62                       | norm. |
|               | 50 nM                            | 76                                  | 67                       | 81                       |       |
|               | 100 nM                           | 83                                  | 78                       | 87                       |       |
|               | 500 nM                           | 74                                  | 69                       | 80                       |       |
|               | 1 $\mu$ M                        | 74                                  | 64                       | 80                       |       |
|               | 5 $\mu$ M                        | 46                                  | 38                       | 52                       |       |
| <b>2C</b>     | control                          | 73                                  | 66                       | 83                       | norm. |
|               | 50 nM                            | 77                                  | 67                       | 81                       |       |
|               | 100 nM                           | 80                                  | 71                       | 92                       |       |
|               | 500 nM                           | 74                                  | 63                       | 85                       |       |
|               | 1 $\mu$ M                        | 69                                  | 56                       | 78                       |       |
|               | 5 $\mu$ M                        | 41                                  | 22                       | 58                       |       |
| <b>2D</b>     | WT control                       | 101                                 | 95                       | 104                      | norm. |
|               | WT 50 nM ABA                     | 100                                 | 91                       | 106                      |       |
|               | not control                      | 91                                  | 86                       | 96                       |       |
|               | not 50 nM ABA                    | 103                                 | 99                       | 112                      |       |
| <b>S1</b>     | control                          | 52                                  | 46                       | 64                       | norm. |
|               | 50 nM                            | 81                                  | 75                       | 81                       |       |
|               | 100 nM                           | 84                                  | 77                       | 86                       |       |
|               | 500 nM                           | 71                                  | 67                       | 76                       |       |
|               | 1 $\mu$ M                        | 75                                  | 67                       | 80                       |       |
|               | 5 $\mu$ M                        | 40                                  | 36                       | 45                       |       |
| <b>S2</b>     | WT                               | 28                                  | 22                       | 33                       | norm. |
|               | sit                              | 26                                  | 23                       | 27                       |       |
| <b>S4</b>     | control                          | 68                                  | 62                       | 73                       | norm. |
|               | fluridone 10 $\mu$ M             | 53                                  | 51                       | 57                       |       |
