# Supplementary material for: Endogenous Abscisic Acid Promotes Hypocotyl Growth and Affects Endoreduplication during Dark-Induced Growth in Tomato (Solanum lycopersicum L.)
Source: PubMed Central journal article supplement (PMC4334974; doi:10.1371/journal.pone.0117793), 2015-02-19
Supplement: pone.0117793.s002.pdf [file pone.0117793.s002.pdf]

**Supporting table S2** Absolute quantification of free ABA in tomato seedlings based on three independent experiments  $\pm$  SE from three technical replicates.

| Sample     | Set I.             | Set II.            | Set III.           |
|------------|--------------------|--------------------|--------------------|
|            | ABA<br>[pmol/g FW] | ABA<br>[pmol/g FW] | ABA<br>[pmol/g FW] |
| 6 h – D    | 29 $\pm$ 2.5       | 9 $\pm$ 0.7        | 45 $\pm$ 3.6       |
| 12 h – D   | 18 $\pm$ 5.4       | 6 $\pm$ 0.4        | 25 $\pm$ 4.2       |
| 24 h – D   | 5 $\pm$ 0.1        | 4 $\pm$ 0.3        | n. a.              |
| 48 h – D   | 2 $\pm$ 0.2        | 2 $\pm$ 0.3        | 3 $\pm$ 0.3        |
| 72 h – D   | 1 $\pm$ 0.2        | 1 $\pm$ 0.1        | 7 $\pm$ 1.4        |
| 96 h – D   | 8 $\pm$ 1.7        | 7 $\pm$ 0.9        | 26 $\pm$ 1.0       |
| 96 h – BL  | 5 $\pm$ 0.7        | 3 $\pm$ 0.5        | 8 $\pm$ 1.2        |
| 120 h – D  | 11 $\pm$ 0.5       | 15 $\pm$ 0.6       | 32 $\pm$ 0.8       |
| 120 h – BL | 7 $\pm$ 0.2        | 8 $\pm$ 0.6        | 12 $\pm$ 1.6       |

n. a.: not analyzed - sample lost during the analysis
