# Supplementary material for: Endogenous Abscisic Acid Promotes Hypocotyl Growth and Affects Endoreduplication during Dark-Induced Growth in Tomato (Solanum lycopersicum L.)
Source: PubMed Central journal article supplement (PMC4334974; doi:10.1371/journal.pone.0117793), 2015-02-19
Supplement: pone.0117793.s003.pdf [file pone.0117793.s003.pdf]

**Supporting table S3** Absolute quantification of free ABA in hypocotyls of ABA-deficient mutants and corresponding WTs based on two biological repeats  $\pm$  SE from two technical replicates.

| Sample                          | Set I.                           | Set II.                          |
|---------------------------------|----------------------------------|----------------------------------|
|                                 | ABA<br>[pmol/g FW]               | ABA<br>[pmol/g FW]               |
| <i>sit</i>                      | <b>0.8 <math>\pm</math> 0.2</b>  | <b>0.8<math>\pm</math>0.1</b>    |
| <b>WT</b> (cv. Rheinlands-Ruhm) | <b>17.9 <math>\pm</math> 0.4</b> | <b>18 <math>\pm</math> 1.9</b>   |
| <i>not</i>                      | <b>2.6 <math>\pm</math> 0.5</b>  | <b>2.9 <math>\pm</math> 0.0</b>  |
| <b>WT</b> (cv. Lukullus)        | <b>21.8 <math>\pm</math> 0.6</b> | <b>19.5 <math>\pm</math> 1.4</b> |
