# Supplementary material for: Endogenous Abscisic Acid Promotes Hypocotyl Growth and Affects Endoreduplication during Dark-Induced Growth in Tomato (Solanum lycopersicum L.)
Source: PubMed Central journal article supplement (PMC4334974; doi:10.1371/journal.pone.0117793), 2015-02-19
Supplement: pone.0117793.s004.pdf [file pone.0117793.s004.pdf]

**Supporting table S4** Absolute quantification of CK levels in tomato seedlings  $\pm$  SE based on three independent experiments. <LOD indicates that the levels of the corresponding compound were below the limit of detection; cZ *cis*-zeatin compounds, tZ *trans*-zeatin compounds, DHZ dihydrozeatin compounds, iP isopentenyladenine compounds, xR ribosides, xOG O-glucosides, x9G 9-glucosides, xMP monophosphates, x7G 7-glucosides.

| CKs    | wt control           |       |      | wt 100 nM ABA        |       |      | sit control          |       |      | sit ABA 100 nM       |       |      |
|--------|----------------------|-------|------|----------------------|-------|------|----------------------|-------|------|----------------------|-------|------|
|        | [pmol/g FW] $\pm$ SE |       |      | [pmol/g FW] $\pm$ SE |       |      | [pmol/g FW] $\pm$ SE |       |      | [pmol/g FW] $\pm$ SE |       |      |
| cZ     | <b>0.09</b>          | $\pm$ | 0.03 | <b>0.13</b>          | $\pm$ | 0.01 | <b>0.14</b>          | $\pm$ | 0.02 | <b>0.10</b>          | $\pm$ | 0.01 |
| cZR    | <b>0.37</b>          | $\pm$ | 0.04 | <b>0.42</b>          | $\pm$ | 0.05 | <b>1.13</b>          | $\pm$ | 0.40 | <b>0.33</b>          | $\pm$ | 0.05 |
| cZOG   | <b>0.09</b>          | $\pm$ | 0.03 | <b>0.13</b>          | $\pm$ | 0.02 | <b>0.14</b>          | $\pm$ | 0.01 | <b>0.08</b>          | $\pm$ | 0.01 |
| cZ9G   | <b>0.15</b>          | $\pm$ | 0.00 | <b>0.14</b>          | $\pm$ | 0.01 | <b>0.11</b>          | $\pm$ | 0.02 | <b>0.10</b>          | $\pm$ | 0.01 |
| cZROG  | <b>0.15</b>          | $\pm$ | 0.01 | <b>0.15</b>          | $\pm$ | 0.02 | <b>0.41</b>          | $\pm$ | 0.15 | <b>0.18</b>          | $\pm$ | 0.04 |
| cZRMP  | <b>0.36</b>          | $\pm$ | 0.01 | <b>0.55</b>          | $\pm$ | 0.20 | <b>0.43</b>          | $\pm$ | 0.14 | <b>0.64</b>          | $\pm$ | 0.23 |
| cZ7G   | <b>8.55</b>          | $\pm$ | 0.59 | <b>8.79</b>          | $\pm$ | 0.26 | <b>10.76</b>         | $\pm$ | 0.35 | <b>8.29</b>          | $\pm$ | 0.65 |
| tZ     | <b>0.17</b>          | $\pm$ | 0.02 | <b>0.09</b>          | $\pm$ | 0.02 | <b>0.21</b>          | $\pm$ | 0.04 | <b>0.16</b>          | $\pm$ | 0.01 |
| tZR    | <b>1.35</b>          | $\pm$ | 0.09 | <b>0.55</b>          | $\pm$ | 0.02 | <b>1.12</b>          | $\pm$ | 0.17 | <b>0.60</b>          | $\pm$ | 0.08 |
| tZOG   | <b>0.10</b>          | $\pm$ | 0.02 | <b>0.07</b>          | $\pm$ | 0.02 | <b>0.13</b>          | $\pm$ | 0.03 | <b>0.08</b>          | $\pm$ | 0.01 |
| tZ9G   | <b>0.28</b>          | $\pm$ | 0.03 | <b>0.18</b>          | $\pm$ | 0.00 | <b>0.46</b>          | $\pm$ | 0.06 | <b>0.28</b>          | $\pm$ | 0.05 |
| tZROG  | <b>0.57</b>          | $\pm$ | 0.06 | <b>0.51</b>          | $\pm$ | 0.09 | <b>1.34</b>          | $\pm$ | 0.07 | <b>1.01</b>          | $\pm$ | 0.10 |
| tZRMP  | <b>0.66</b>          | $\pm$ | 0.08 | <b>0.28</b>          | $\pm$ | 0.02 | <b>0.53</b>          | $\pm$ | 0.06 | <b>0.57</b>          | $\pm$ | 0.05 |
| tZ7G   | <b>8.26</b>          | $\pm$ | 0.47 | <b>5.33</b>          | $\pm$ | 0.43 | <b>15.44</b>         | $\pm$ | 0.50 | <b>9.34</b>          | $\pm$ | 1.88 |
| DHZ    | <b>0.01</b>          | $\pm$ | 0.00 | <b>0.01</b>          | $\pm$ | 0.00 | <b>0.02</b>          | $\pm$ | 0.00 | <b>0.01</b>          | $\pm$ | 0.00 |
| DHZR   | <b>0.10</b>          | $\pm$ | 0.01 | <b>0.05</b>          | $\pm$ | 0.01 | <b>0.14</b>          | $\pm$ | 0.02 | <b>0.09</b>          | $\pm$ | 0.05 |
| DHZOG  | <b>0.06</b>          | $\pm$ | 0.00 | <b>0.08</b>          | $\pm$ | 0.01 | <b>0.11</b>          | $\pm$ | 0.03 | <b>0.07</b>          | $\pm$ | 0.02 |
| DHZ9G  | <LOD                 |       |      | <LOD                 |       |      | <LOD                 |       |      | <LOD                 |       |      |
| DHZROG | <b>0.73</b>          | $\pm$ | 0.08 | <b>1.10</b>          | $\pm$ | 0.38 | <b>2.19</b>          | $\pm$ | 0.17 | <b>1.82</b>          | $\pm$ | 0.50 |
| DHZRMP | <LOD                 |       |      | <LOD                 |       |      | <LOD                 |       |      | <LOD                 |       |      |
| DHZ7G  | <b>23.29</b>         | $\pm$ | 1.40 | <b>26.91</b>         | $\pm$ | 4.26 | <b>73.61</b>         | $\pm$ | 0.61 | <b>44.07</b>         | $\pm$ | 3.54 |
| iP     | <b>0.24</b>          | $\pm$ | 0.02 | <b>0.42</b>          | $\pm$ | 0.09 | <b>0.33</b>          | $\pm$ | 0.06 | <b>0.32</b>          | $\pm$ | 0.12 |
| iPR    | <b>0.12</b>          | $\pm$ | 0.03 | <b>0.14</b>          | $\pm$ | 0.04 | <b>0.31</b>          | $\pm$ | 0.07 | <b>0.26</b>          | $\pm$ | 0.06 |
| iP9G   | <b>0.12</b>          | $\pm$ | 0.02 | <b>0.15</b>          | $\pm$ | 0.04 | <b>0.13</b>          | $\pm$ | 0.01 | <b>0.15</b>          | $\pm$ | 0.02 |
| iPRMP  | <b>0.40</b>          | $\pm$ | 0.07 | <b>0.31</b>          | $\pm$ | 0.09 | <b>0.49</b>          | $\pm$ | 0.06 | <b>0.41</b>          | $\pm$ | 0.06 |
| iP7G   | <b>14.43</b>         | $\pm$ | 0.94 | <b>14.09</b>         | $\pm$ | 1.02 | <b>40.38</b>         | $\pm$ | 3.59 | <b>48.05</b>         | $\pm$ | 1.12 |
| SUMA   | <b>60.64</b>         | $\pm$ | 4.02 | <b>60.58</b>         | $\pm$ | 7.12 | <b>150.07</b>        | $\pm$ | 6.63 | <b>117.00</b>        | $\pm$ | 8.66 |
