# Supplementary material for: Endogenous Abscisic Acid Promotes Hypocotyl Growth and Affects Endoreduplication during Dark-Induced Growth in Tomato (Solanum lycopersicum L.)
Source: PubMed Central journal article supplement (PMC4334974; doi:10.1371/journal.pone.0117793), 2015-02-19
Supplement: pone.0117793.s005.pdf [file pone.0117793.s005.pdf]

**Supporting table A** Fold change in *LeNCED1* transcript expression based on three independent experiments.

| Sample     | Set I.<br>Relative<br>expression | Set II.<br>Relative<br>expression | Set III.<br>Relative<br>expression |
|------------|----------------------------------|-----------------------------------|------------------------------------|
| 6 h – D    | 0.07                             | 0.00                              | 0.00                               |
| 12 h – D   | 0.00                             | 0.00                              | 0.00                               |
| 24 h – D   | 0.04                             | 0.00                              | 0.00                               |
| 48 h – D   | 0.00                             | 0.00                              | 0.00                               |
| 72 h – D   | 0.24                             | 0.04                              | 0.17                               |
| 96 h – D   | 0.75                             | 0.30                              | 0.54                               |
| 96 h – BL  | 0.32                             | 0.12                              | 0.23                               |
| 120 h – D  | 1.00                             | 1.00                              | 1.00                               |
| 120 h – BL | 0.46                             | 0.34                              | 0.51                               |

**Supporting Table B** Fold change in *SICYP707A3* transcript expression based on three independent experiments.

| Sample     | Set I.<br>Relative<br>expression | Set II.<br>Relative<br>expression | Set III.<br>Relative<br>expression |
|------------|----------------------------------|-----------------------------------|------------------------------------|
| 6 h – D    | 0.60                             | 1.13                              | 0.72                               |
| 12 h – D   | 1.33                             | 1.36                              | 1.72                               |
| 24 h – D   | 1.42                             | 2.29                              | 1.22                               |
| 48 h – D   | 3.64                             | 1.90                              | 2.14                               |
| 72 h – D   | 1.33                             | 2.21                              | 0.73                               |
| 96 h – D   | 0.91                             | 1.17                              | 0.82                               |
| 96 h – BL  | 1.63                             | 5.37                              | 2.34                               |
| 120 h – D  | 1.00                             | 1.00                              | 1.00                               |
| 120 h – BL | 1.73                             | 1.02                              | 1.88                               |

**Supporting table C** Fold change in *SIKRP1* and *SIKRP3* transcript expression based on three independent experiments.

| Gene          | Sample                | Set I.<br>Relative<br>expression | Set II.<br>Relative<br>expression | Set III.<br>Relative<br>expression |
|---------------|-----------------------|----------------------------------|-----------------------------------|------------------------------------|
| <i>SIKRP1</i> | wt control            | 1.00                             | 1.00                              | 1.00                               |
|               | wt ABA 100 nM         | 0.91                             | 1.00                              | 1.11                               |
|               | <i>sit</i> control    | 0.83                             | 0.78                              | 0.89                               |
|               | <i>sit</i> ABA 100 nM | 0.95                             | 0.89                              | 1.04                               |
| <i>SIKRP3</i> | wt control            | 0.57                             | 0.60                              | 0.64                               |
|               | wt ABA 100 nM         | 0.50                             | 0.66                              | 0.67                               |
|               | <i>sit</i> control    | 0.46                             | 0.45                              | 0.50                               |
|               | <i>sit</i> ABA 100 nM | 0.55                             | 0.50                              | 0.62                               |

**Supporting table D** Fold change in *SILOG2* transcript expression based on three independent experiments.

| Sample                       | Set I.<br>Relative<br>expression | Set II.<br>Relative<br>expression | Set III.<br>Relative<br>expression |
|------------------------------|----------------------------------|-----------------------------------|------------------------------------|
| <b>wt control</b>            | 1.00                             | 1.00                              | 1.00                               |
| <b>wt ABA 100 nM</b>         | 0.76                             | 0.93                              | 0.88                               |
| <b><i>sit</i> control</b>    | 1.39                             | 2.49                              | 1.98                               |
| <b><i>sit</i> ABA 100 nM</b> | 1.12                             | 1.57                              | 1.35                               |
