# Supplementary material for: Endogenous Abscisic Acid Promotes Hypocotyl Growth and Affects Endoreduplication during Dark-Induced Growth in Tomato (Solanum lycopersicum L.)
Source: PubMed Central journal article supplement (PMC4334974; doi:10.1371/journal.pone.0117793), 2015-02-19
Supplement: pone.0117793.s007.pdf [file pone.0117793.s007.pdf]

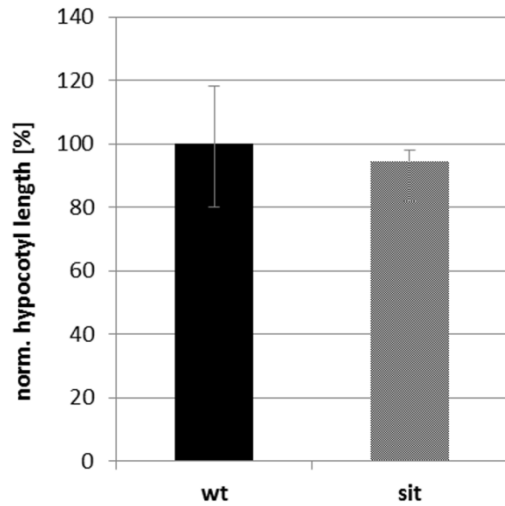

**Supporting figure S2** The effect of the *sit* mutation on hypocotyl length in BL-grown seedlings. Seeds of the WT (cv. Rheinlands Ruhm) and *sit* mutant were germinated in darkness and then grown under continuous BL for 4 days. The results shown in the figure represent the medians of normalized length of hypocotyls from 1 independent experiment; the error bars represent the boundaries of the first and third quartiles. The sample "wt" was set as 100% hypocotyl length and all other values (medians, quartiles) are expressed as percentage of this value (Mann-Whitney test,  $p > 0.05$ ,  $n=40$ ).
