# Supplementary material for: Endogenous Abscisic Acid Promotes Hypocotyl Growth and Affects Endoreduplication during Dark-Induced Growth in Tomato (Solanum lycopersicum L.)
Source: PubMed Central journal article supplement (PMC4334974; doi:10.1371/journal.pone.0117793), 2015-02-19
Supplement: pone.0117793.s008.pdf [file pone.0117793.s008.pdf]

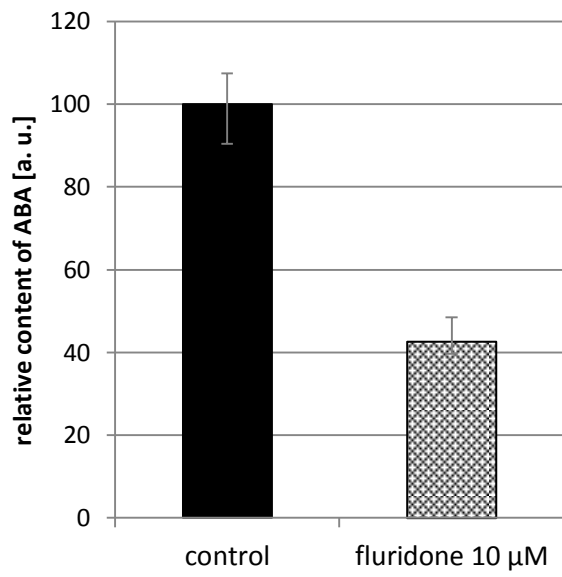

**Supporting figure S3** The endogenous ABA content in fluridone treated WT hypocotyls (cv. Rutgers). Free ABA levels are reported as relative means [a.u.]  $\pm$  SE based on two independent experiments. The control sample was assigned a value of 100 a.u.
