# Supplementary material for: Endogenous Abscisic Acid Promotes Hypocotyl Growth and Affects Endoreduplication during Dark-Induced Growth in Tomato (Solanum lycopersicum L.)
Source: PLOS journal article supplement (doi:10.1371/journal.pone.0117793), 2015-02-19
Supplement: S10 (10.1371/journal.pone.0117793.s010) [file journal.pone.0117793.s010]

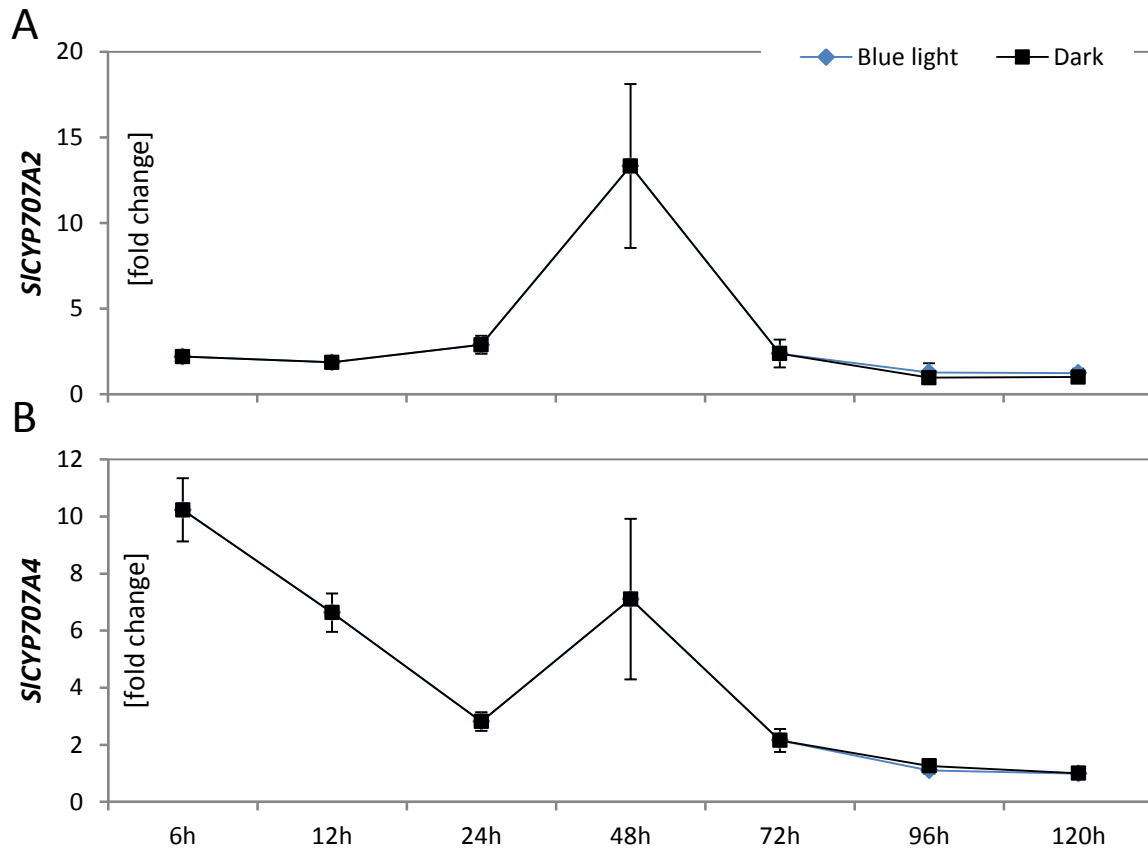

**Supporting figure S5** The relative expression of the A) *SICYP707A2* and B) *SICYP707A4* ABA catabolic genes. Values shown are the geometric means of three biological replicates  $\pm$  SE. *Tip41like* and *PP2ACs* were used as housekeeping genes. All values are expressed in arbitrary units relative to the expression of the corresponding gene in the 120h-Dark<sup>1</sup> sample.
